# Supplementary material for: High-performance photodetectors based on Sb2S3 nanowires: wavelength dependence and wide temperature range utilization
Source: Royal Society of Chemistry journal article supplement (doi:10.1039/c7nr03574h), 2017-01-01
Supplement: c7nr03574h1.pdf [file c7nr03574h1.pdf]

## Electronic Supplementary Information

### High-performance photodetector based on $\text{Sb}_2\text{S}_3$ nanowire: wavelength dependence and wide temperature range utilization

Mianzeng Zhong<sup>a</sup>, Xinghua Wang<sup>b</sup>, Sijie Liu<sup>a</sup>, Bo Li<sup>a</sup>, Le Huang<sup>c</sup>, Yu Cui<sup>a</sup>, Jingbo Li<sup>a</sup> and Zhongming Wei<sup>a\*</sup>

<sup>a</sup>State Key Laboratory of Superlattices and Microstructures, Institute of Semiconductors, Chinese Academy of Sciences & College of Materials Science and Opto-Electronic Technology, University of Chinese Academy of Sciences, Beijing 100083, China, E-mail: [zmwei@semi.ac.cn](mailto:zmwei@semi.ac.cn).

<sup>b</sup>Department of Ophthalmology, Union Hospital, Tongji Medical College, Huazhong University of Science and Technology, Wuhan, 430022, China.

<sup>c</sup>School of Materials and Energy, Guangdong University of Technology, Guangzhou, Guangdong 510006, China.

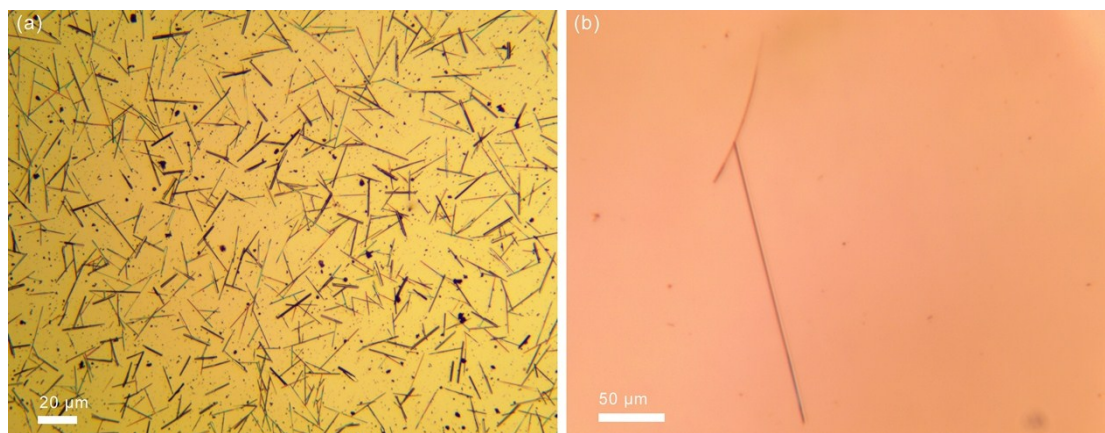

**Fig. S1** (a) Optical microscopy image of as-prepared  $\text{Sb}_2\text{S}_3$  nanowires. (b) Magnified optical microscopy image of the typical individual  $\text{Sb}_2\text{S}_3$  nanowire.

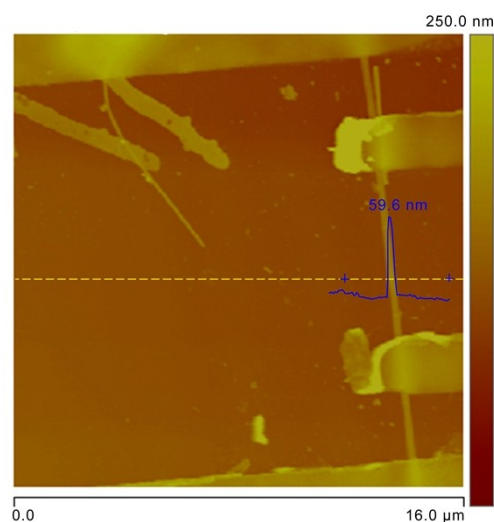

**Fig. S2** The AFM image of a typical individual  $\text{Sb}_2\text{S}_3$  NW based photodetector. The diameter of this NW is 59.6 nm.

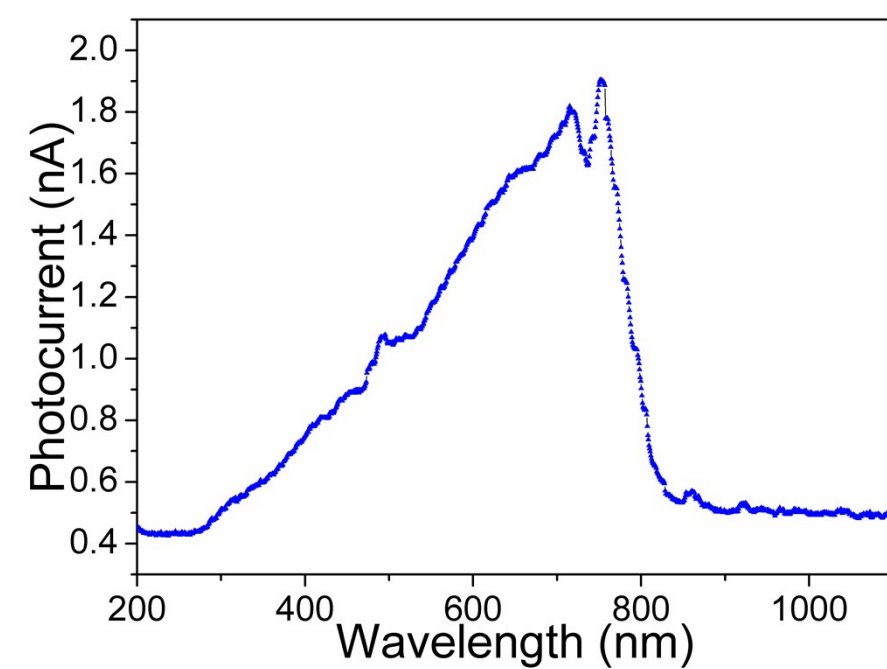

**Fig. S3** The wavelength-dependent photocurrent response of the photodetector.

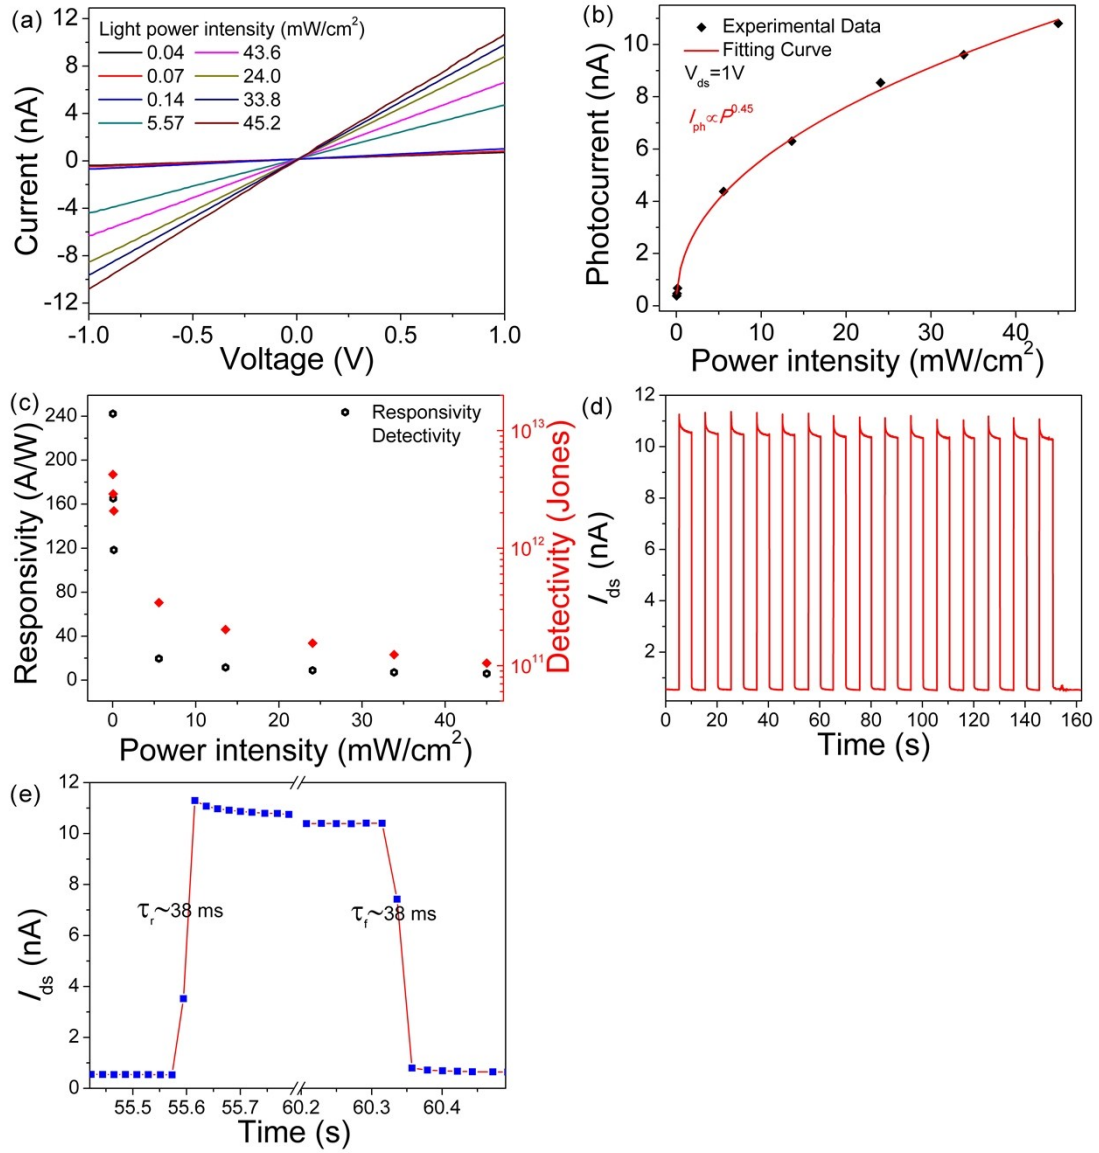

**Fig. S4** (a)  $I$ - $V$  curves of the photodetector under the illumination of 450 nm laser with different light power intensities (from 0 to 45 mW/cm<sup>2</sup>); (b) The light power density dependence of the photocurrent measured with a bias voltage of 1 V under the illumination of 450 nm laser; (c) Light intensity dependent spectral responsivity (dark) and detectivity (red) at the illumination of 450 nm laser under a bias of 1 V; (d) The photoswitching behaviours, (e) photocurrent rise and decay of this photodetector under illumination of 450 nm laser with a light intensity of 45.2 mW/cm<sup>2</sup> and a bias voltage of 1 V.

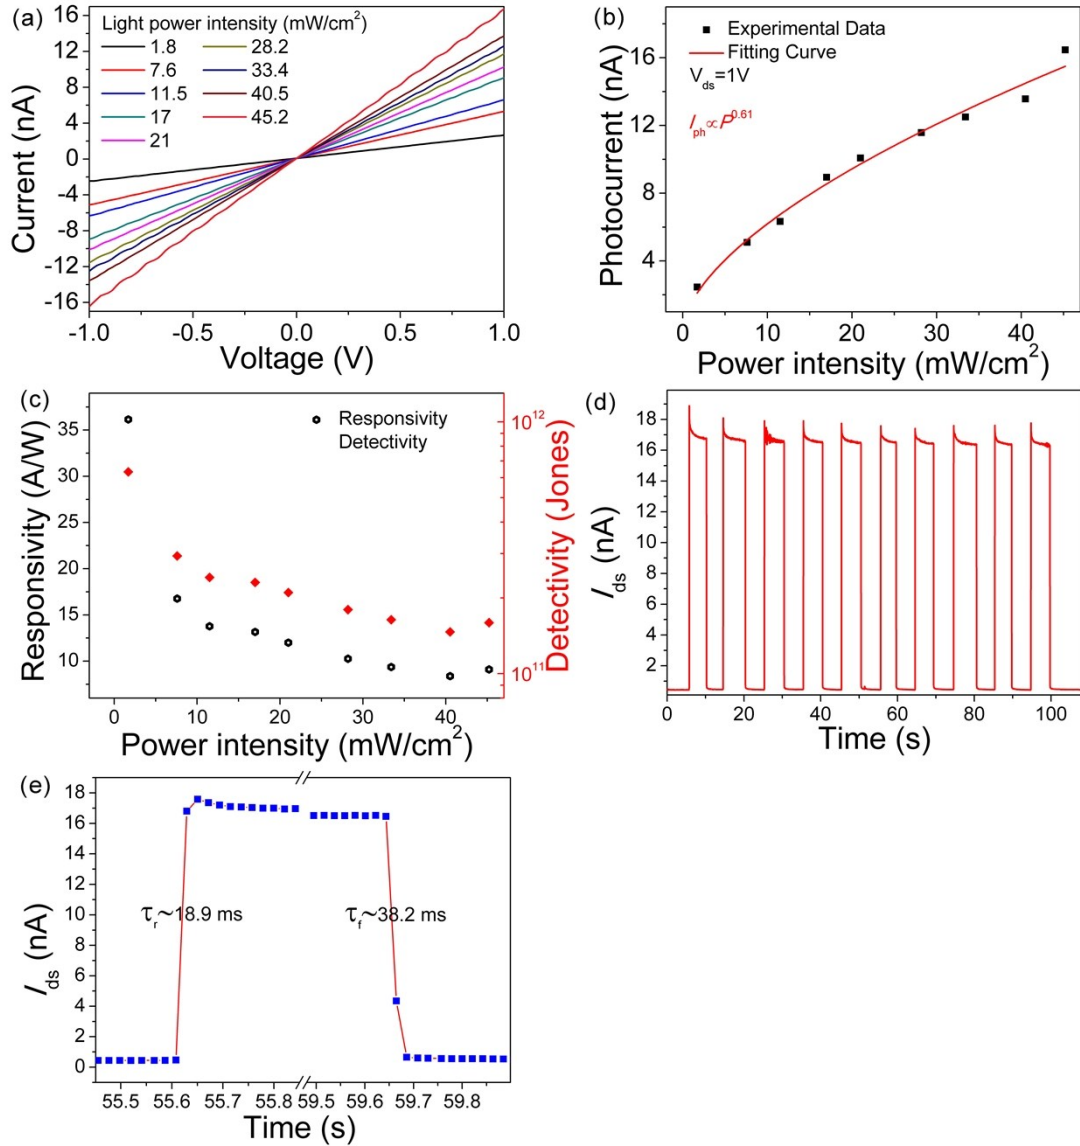

**Fig. S5** (a)  $I$ - $V$  curves of the photodetector under the illumination of 532 nm laser with different light power intensities (from 1.8 to 45.2 mW/cm<sup>2</sup>); (b) The light power density dependence of the photocurrent measured with a bias voltage of 1 V under the illumination of 532 nm laser; (c) Light intensity dependent spectral responsivity (dark) and detectivity (red) at the illumination of 532 nm laser under a bias of 1 V; (d) The photoswitching behaviours, (e) photocurrent rise and decay of this photodetector under illumination of 532 nm laser with a light intensity of 45.2 mW/cm<sup>2</sup> and a bias voltage of 1 V.
